# Supplementary material for: Dynamics of Microbiota in Three Backslopped Liquid Sourdoughs That Were Triggered with the Same Starter Strains
Source: MDPI journal article supplement (doi:10.3390/fermentation8100571), 2022-10-21
Supplement: s1 [file s1]

Archive with 4 entries (4 files):
- Figure S3.pdf
- Figure S2.pdf
- Figure S1.pdf
- Figure S4.pdf
