# Supplementary material for: Dynamics of Microbiota in Three Backslopped Liquid Sourdoughs That Were Triggered with the Same Starter Strains
Source: MDPI journal article supplement (doi:10.3390/fermentation8100571), 2022-10-21
Supplement: s1 [file s1]

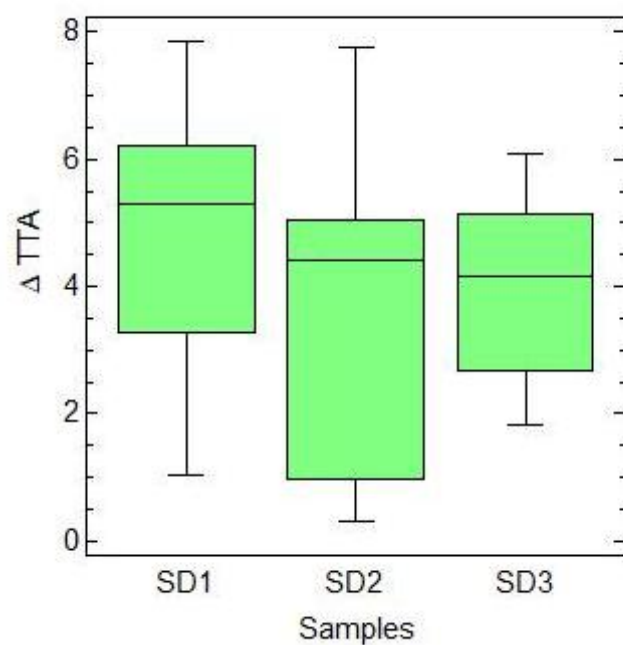

**Figure S4.** Values of  $\Delta TTA$  (difference between the initial TTA value and the values after sourdough refreshment). Data are the means from three independent experiments ( $n=3$ ). The inner line of each box represents the median; the top and bottom of the box represent the 75th and 25th percentiles of the data, respectively. The top and bottom of the bars represent the 100% of the data. The square outside the box plot represents the outlier of the data.
