# Supplementary figures and images for: Dynamics of Microbiota in Three Backslopped Liquid Sourdoughs That Were Triggered with the Same Starter Strains
Source: MDPI journal article supplement (doi:10.3390/fermentation8100571), 2022-10-21

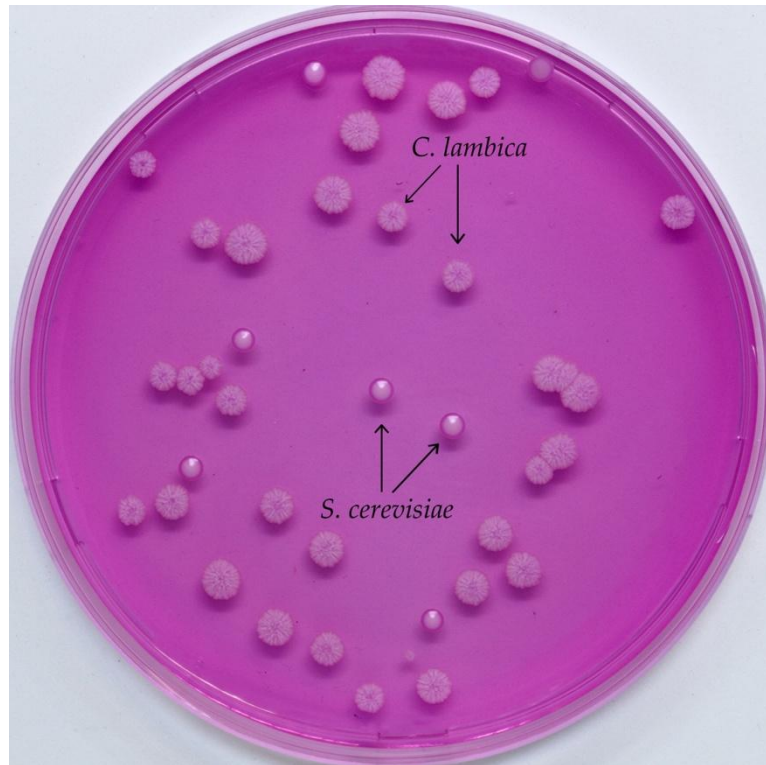

**Figure S1.** Morphology of the colonies for *S. cerevisiae* and *C. lambica* growing on RB medium.

Supplement: s1 [file s1]
